# Supplementary material
Source: PubMed Central journal article supplement (PMC3978801)
Supplement: mt2013142x1.pdf [file mt2013142x1.pdf]

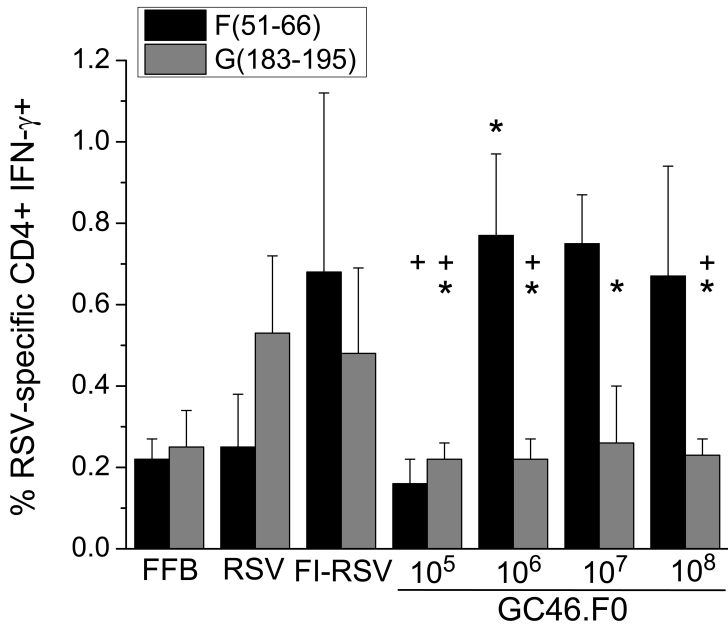

**Figure S1. GC46.F0 induced RSV F-specific CD4+ T cells.** Mice were immunized IM with GC46.F0 and challenged with  $9 \times 10^6$  PFU RSV A2 4 weeks later. T cells responses were assessed by RSV-specific ICS at day 5 post-challenge with CD4+IFN- $\gamma$ + shown as the percentage of CD4+IFN- $\gamma$ + cells in the leukocyte gate. N=5 or 6 mice per group per time point. Statistical significance determined by one-way ANOVA where  $p < 0.05$ . \*=statistically different from RSV-immunized mice; +=statistically different from FI-RSV-immunized mice.
